# Supplementary material
Source: PubMed Central journal article supplement (PMC11205256)

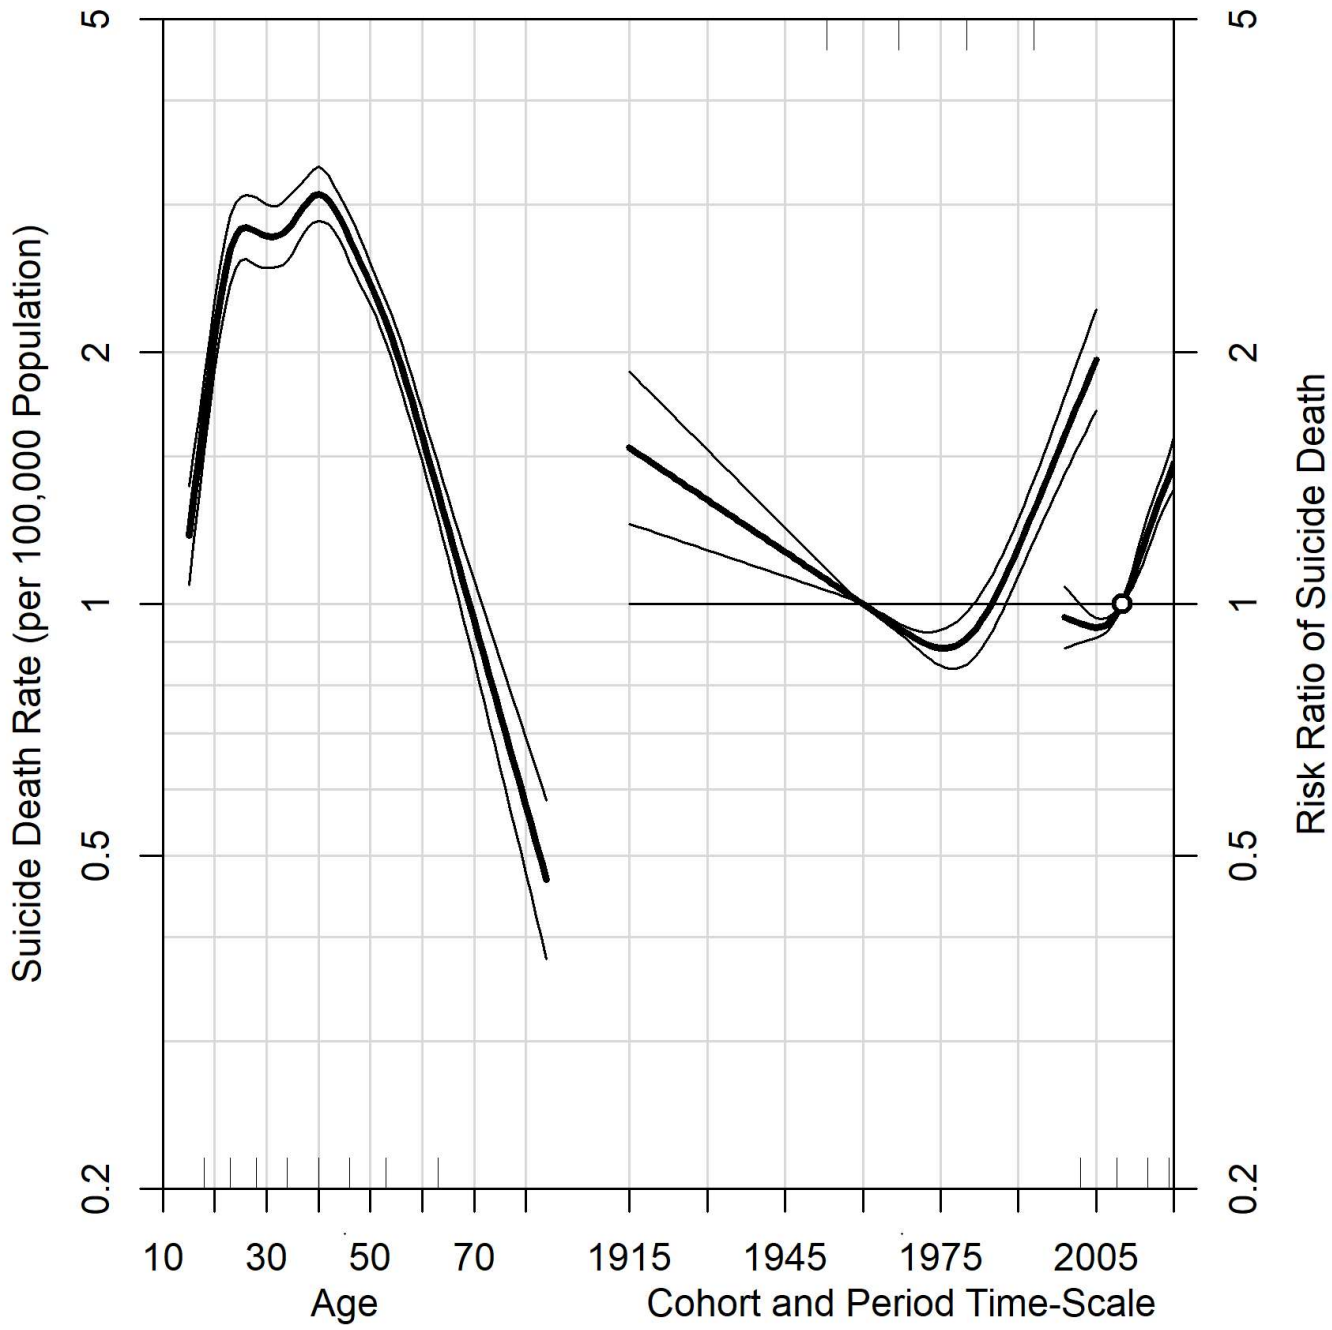

Supplement: NIHMS1987812-supplement-supplemental_figure.pdf [file NIHMS1987812-supplement-supplemental_figure.pdf]
